# Supplementary material for: Rho Signaling Participates in Membrane Fluidity Homeostasis
Source: PubMed Central journal article supplement (PMC3465289; doi:10.1371/journal.pone.0045049), 2012-10-05
Supplement: pone.0045049.s003.pdf [file pone.0045049.s003.pdf]

*ssk2* $\Delta$  *ssk22* $\Delta$   
 $\Delta\Delta\Delta\Delta$   
*bck1* $\Delta$  *ste11* $\Delta$  *ssk2* $\Delta$   
*bck1* $\Delta$  *ste11* $\Delta$  *ssk22* $\Delta$   
*bck1* $\Delta$  *ste11* $\Delta$   
*ste11* $\Delta$   
 wild type

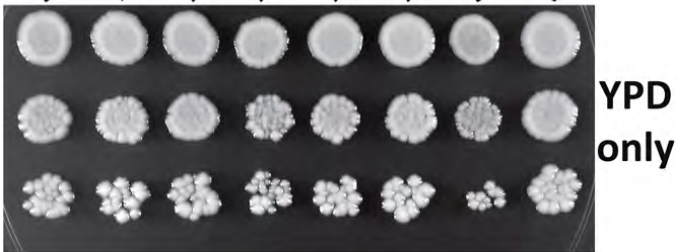

YPD  
only

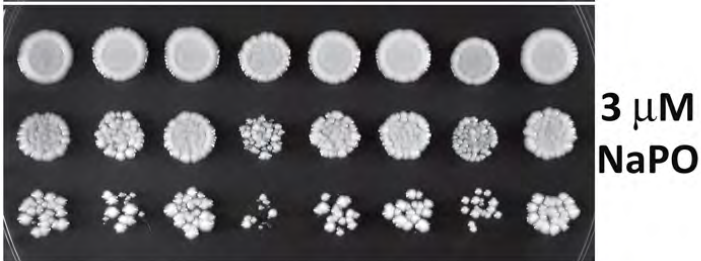

3  $\mu$ M  
NaPO

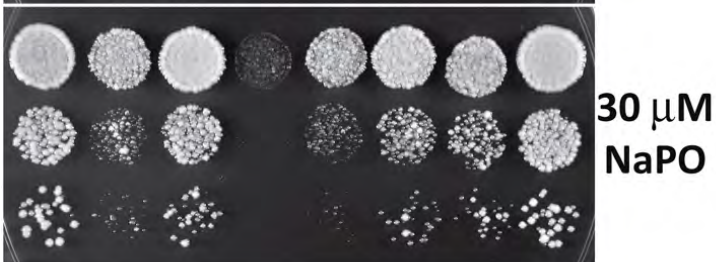

30  $\mu$ M  
NaPO

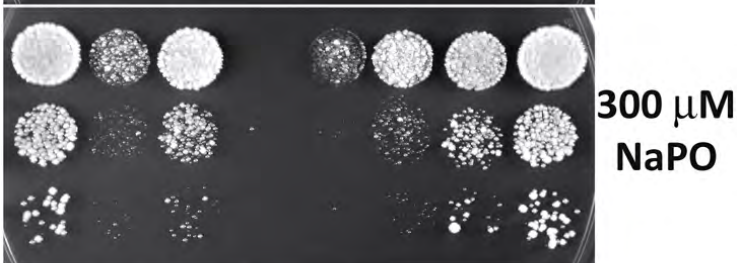

300  $\mu$ M  
NaPO

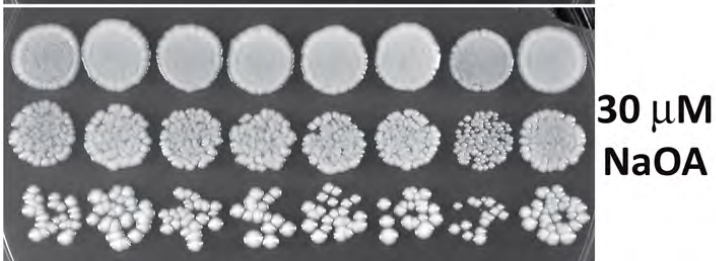

30  $\mu$ M  
NaOA
