# Supplementary material for: Rho Signaling Participates in Membrane Fluidity Homeostasis
Source: PubMed Central journal article supplement (PMC3465289; doi:10.1371/journal.pone.0045049), 2012-10-05

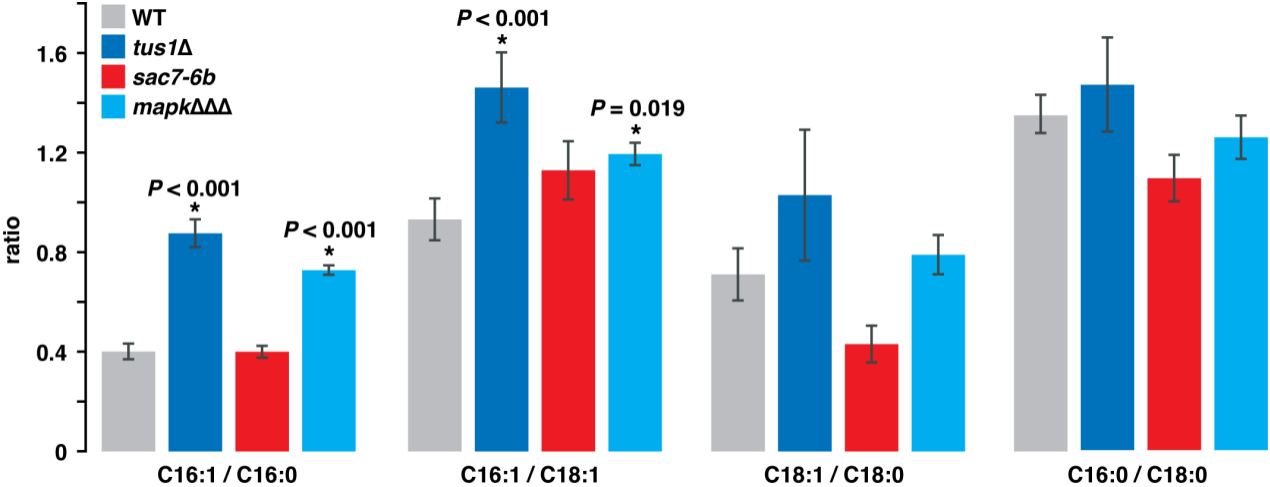

Supplement: pone.0045049.s006.pdf [file pone.0045049.s006.pdf]
