# Supplementary material for: Rho Signaling Participates in Membrane Fluidity Homeostasis
Source: PubMed Central journal article supplement (PMC3465289; doi:10.1371/journal.pone.0045049), 2012-10-05
Supplement: pone.0045049.s007.pdf [file pone.0045049.s007.pdf]

*ste11*Δ

*bck1*Δ

wild type

*ste11*Δ

*bck1*Δ

wild type

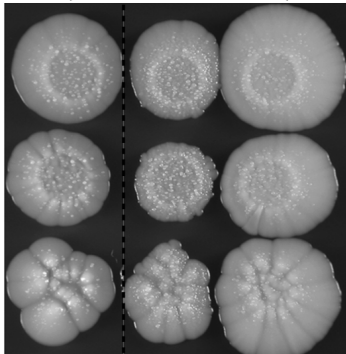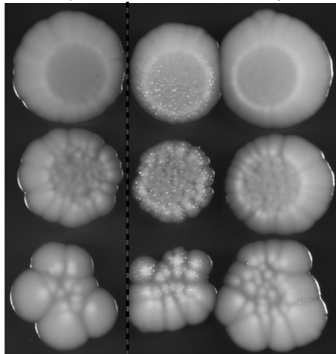

37°

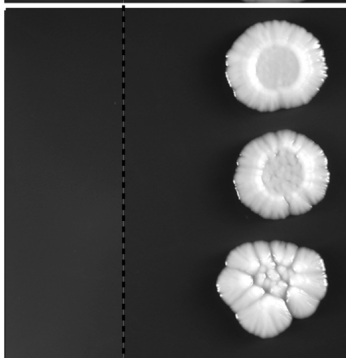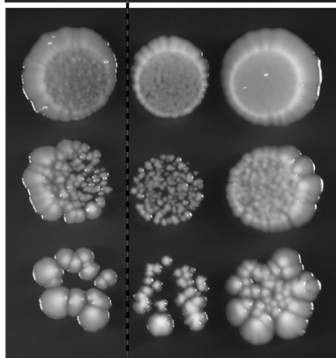

39°

YPD

YPD + 1M sorb.
