# Supplementary material for: Rho Signaling Participates in Membrane Fluidity Homeostasis
Source: PLoS One. 2012 Oct 5;7(10):e45049. doi: 10.1371/journal.pone.0045049 (PMC3465289; doi:10.1371/journal.pone.0045049)
Supplement: Table S2 — PL Acyl Content (Primary Data). (PDF) [file pone.0045049.s010.pdf]

| strain           | sample      | percentages |       |       |       | ratios of percentages |             |             |             |         |
|------------------|-------------|-------------|-------|-------|-------|-----------------------|-------------|-------------|-------------|---------|
|                  |             | C18:0       | C18:1 | C16:0 | C16:1 | C16:1/C16:0           | C16:1/C18:1 | C18:1/C18:0 | C16:0/C18:0 | C16/C18 |
| wild type        | 102009-5    | 41.2        | 9.8   | 35.8  | 13.2  | 0.37                  | 1.35        | 0.24        | 0.87        | 0.96    |
|                  | 102009-6    | 29.3        | 14.9  | 38.0  | 17.8  | 0.47                  | 1.19        | 0.51        | 1.29        | 1.26    |
|                  | 102009-7    | 21.7        | 20.3  | 36.5  | 21.5  | 0.59                  | 1.06        | 0.93        | 1.68        | 1.38    |
|                  | 110609-4    | 29.6        | 16.6  | 40.4  | 13.4  | 0.33                  | 0.81        | 0.56        | 1.37        | 1.17    |
|                  | 110609-5    | 34.9        | 13.8  | 37.9  | 13.4  | 0.35                  | 0.97        | 0.40        | 1.09        | 1.05    |
|                  | 110609-6    | 30.1        | 15.9  | 39.5  | 14.5  | 0.37                  | 0.91        | 0.53        | 1.31        | 1.17    |
|                  | 110609-7    | 24.1        | 20.6  | 36.3  | 19.0  | 0.52                  | 0.92        | 0.86        | 1.51        | 1.24    |
|                  | 110609-8    | 41.9        | 12.4  | 35.3  | 10.4  | 0.29                  | 0.84        | 0.30        | 0.84        | 0.84    |
|                  | 110609-9    | 45.6        | 9.2   | 36.5  | 8.7   | 0.24                  | 0.94        | 0.20        | 0.80        | 0.82    |
|                  | 120409-1    | 19.9        | 37.8  | 36.4  | 6.0   | 0.16                  | 0.16        | 1.90        | 1.83        | 0.73    |
|                  | 120409-2    | 22.0        | 30.5  | 37.4  | 10.1  | 0.27                  | 0.33        | 1.39        | 1.70        | 0.90    |
|                  | 120409-3    | 23.6        | 30.2  | 38.8  | 7.4   | 0.19                  | 0.25        | 1.28        | 1.64        | 0.86    |
|                  | #10 012610  | 29.0        | 14.5  | 36.1  | 16.6  | 0.46                  | 1.14        | 0.50        | 1.25        | 1.21    |
|                  | #11 012610  | 26.8        | 15.0  | 35.7  | 18.2  | 0.51                  | 1.22        | 0.56        | 1.33        | 1.29    |
|                  | #12 012610  | 30.1        | 12.6  | 36.3  | 17.0  | 0.47                  | 1.34        | 0.42        | 1.21        | 1.25    |
|                  | #1 021610   | 26.5        | 16.2  | 34.8  | 17.7  | 0.51                  | 1.09        | 0.61        | 1.31        | 1.23    |
|                  | #2 021610   | 18.2        | 17.2  | 35.0  | 21.8  | 0.62                  | 1.27        | 0.94        | 1.92        | 1.61    |
|                  | #3 021610   | 25.0        | 16.4  | 33.7  | 16.3  | 0.48                  | 0.99        | 0.66        | 1.35        | 1.21    |
|                  | WT ave      | 28.9        | 18.0  | 36.7  | 14.6  | 0.40                  | 0.93        | 0.71        | 1.35        | 1.12    |
|                  | WT s.e.m.   | 1.8         | 1.8   | 0.4   | 1.1   | 0.03                  | 0.08        | 0.10        | 0.08        | 0.05    |
| tus1             | 120409-7    | 13.0        | 29.9  | 28.3  | 28.8  | 1.02                  | 0.97        | 2.30        | 2.18        | 1.33    |
|                  | 120409-8    | 14.9        | 24.5  | 31.0  | 29.6  | 0.95                  | 1.21        | 1.64        | 2.08        | 1.54    |
|                  | 120409-9    | 13.6        | 28.5  | 29.1  | 28.8  | 0.99                  | 1.01        | 2.09        | 2.14        | 1.38    |
|                  | #1 012610   | 21.9        | 15.2  | 29.2  | 29.5  | 1.01                  | 1.94        | 0.70        | 1.34        | 1.58    |
|                  | #2 012610   | 31.7        | 12.9  | 29.6  | 22.4  | 0.76                  | 1.74        | 0.41        | 0.93        | 1.17    |
|                  | #3 012610   | 18.4        | 18.2  | 29.3  | 29.5  | 1.01                  | 1.62        | 0.99        | 1.59        | 1.61    |
|                  | #10 021610  | 41.5        | 9.4   | 30.1  | 16.4  | 0.55                  | 1.75        | 0.23        | 0.72        | 0.91    |
|                  | #11 021610  | 35.8        | 10.6  | 31.0  | 22.1  | 0.71                  | 2.08        | 0.30        | 0.87        | 1.14    |
|                  | #12 021610  | 23.7        | 14.5  | 32.3  | 28.8  | 0.89                  | 1.98        | 0.61        | 1.36        | 1.60    |
|                  | tus1 ave    | 23.8        | 18.2  | 30.0  | 26.2  | 0.88                  | 1.46        | 1.03        | 1.47        | 1.36    |
|                  | tus1 s.e.m. | 3.3         | 2.4   | 0.4   | 1.5   | 0.06                  | 0.14        | 0.26        | 0.19        | 0.08    |
| sac7             | #7 012610   | 25.4        | 14.5  | 37.7  | 17.6  | 0.47                  | 1.21        | 0.57        | 1.49        | 1.39    |
|                  | #8 012610   | 36.5        | 11.7  | 35.1  | 11.8  | 0.34                  | 1.01        | 0.32        | 0.96        | 0.97    |
|                  | #9 012610   | 30.6        | 14.2  | 35.1  | 16.5  | 0.47                  | 1.17        | 0.46        | 1.15        | 1.15    |
|                  | #4 021610   | 39.5        | 8.2   | 35.0  | 12.3  | 0.35                  | 1.51        | 0.21        | 0.89        | 0.99    |
|                  | #5 021610   | 26.6        | 18.5  | 31.2  | 11.8  | 0.38                  | 0.64        | 0.70        | 1.17        | 0.95    |
|                  | #6 021610   | 26.4        | 8.7   | 23.8  | 9.5   | 0.40                  | 1.09        | 0.33        | 0.90        | 0.95    |
|                  | sac7 ave    | 30.8        | 12.6  | 33.0  | 13.2  | 0.40                  | 1.13        | 0.43        | 1.09        | 1.07    |
|                  | sac7 s.e.m. | 2.4         | 1.6   | 2.0   | 1.3   | 0.02                  | 0.12        | 0.07        | 0.09        | 0.07    |
| bck1 ste11 ssk22 | 102009-1    | 29.4        | 17.7  | 29.7  | 23.1  | 0.78                  | 1.30        | 0.60        | 1.01        | 1.12    |
|                  | 102009-2    | 28.4        | 17.6  | 30.5  | 23.4  | 0.77                  | 1.33        | 0.62        | 1.08        | 1.17    |
|                  | 102009-3    | 28.4        | 17.6  | 30.5  | 23.4  | 0.77                  | 1.33        | 0.62        | 1.08        | 1.17    |
|                  | 110609-1    | 15.8        | 25.4  | 32.6  | 26.3  | 0.81                  | 1.03        | 1.61        | 2.06        | 1.43    |
|                  | 110609-2    | 28.5        | 24.5  | 28.7  | 18.3  | 0.64                  | 0.75        | 0.86        | 1.01        | 0.89    |
|                  | 110609-3    | 24.4        | 20.4  | 32.1  | 23.2  | 0.72                  | 1.14        | 0.84        | 1.32        | 1.24    |
|                  | 110609-10   | 29.9        | 18.3  | 31.6  | 20.2  | 0.64                  | 1.11        | 0.61        | 1.06        | 1.08    |
|                  | #4 012610   | 22.5        | 18.5  | 31.3  | 23.7  | 0.76                  | 1.28        | 0.82        | 1.39        | 1.34    |
|                  | #5 012610   | 24.8        | 17.9  | 31.1  | 22.6  | 0.73                  | 1.26        | 0.72        | 1.26        | 1.26    |
|                  | #6 012610   | 33.4        | 14.1  | 31.0  | 18.0  | 0.58                  | 1.27        | 0.42        | 0.93        | 1.03    |
|                  | #7 021610   | 25.3        | 18.3  | 29.5  | 21.6  | 0.73                  | 1.18        | 0.72        | 1.17        | 1.17    |
|                  | #8 021610   | 22.3        | 19.5  | 30.0  | 23.8  | 0.79                  | 1.22        | 0.87        | 1.35        | 1.29    |
|                  | #9 021610   | 19.6        | 18.5  | 32.3  | 24.4  | 0.75                  | 1.32        | 0.94        | 1.65        | 1.49    |
|                  | 3D ave      | 25.6        | 19.1  | 30.8  | 22.5  | 0.73                  | 1.19        | 0.79        | 1.26        | 1.21    |
|                  | 3D s.e.m.   | 1.3         | 0.8   | 0.3   | 0.7   | 0.02                  | 0.05        | 0.08        | 0.09        | 0.05    |
